# Supplementary material
Source: Springer Nature journal article supplement (https://www.springermedizin.de/resource/supplementary/12990_2009_195_MOESM3_ESM.pdf/9612764)

NPO

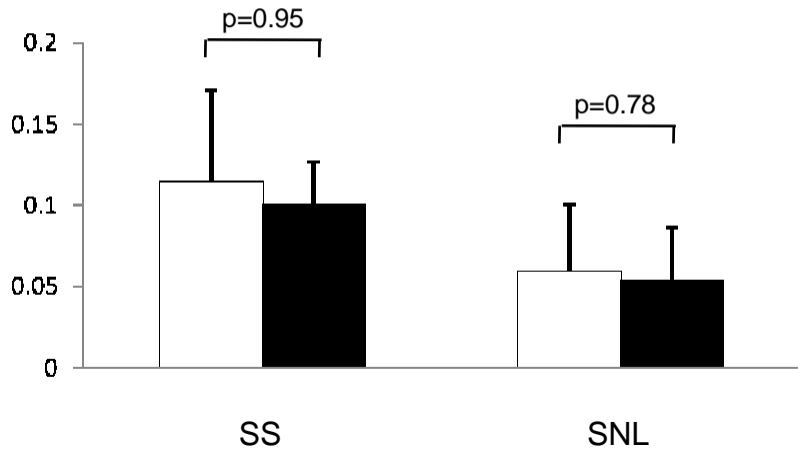

Control

Pretreatment with L-NAME

$p=0.95$

$p=0.78$

SS

SNL

Supplement: MOESM3 [file 9612764]
